# Supplementary material for: A novel family of layered double hydroxides—[MAl4(OH)12](NO3)2·xH2O (M = Co, Ni, Cu, Zn)
Source: Royal Society of Chemistry journal article supplement (doi:10.1039/b409027f), 2004-01-01
Supplement: b409027f.doc [file b409027f.doc]

**Supplementary Information for Fogg *et al.***

**Powder XRD data** Full page powder XRD pattern for [ZnAl4(OH)12](NO3)1.8(CO3)0.1·2.5H2O


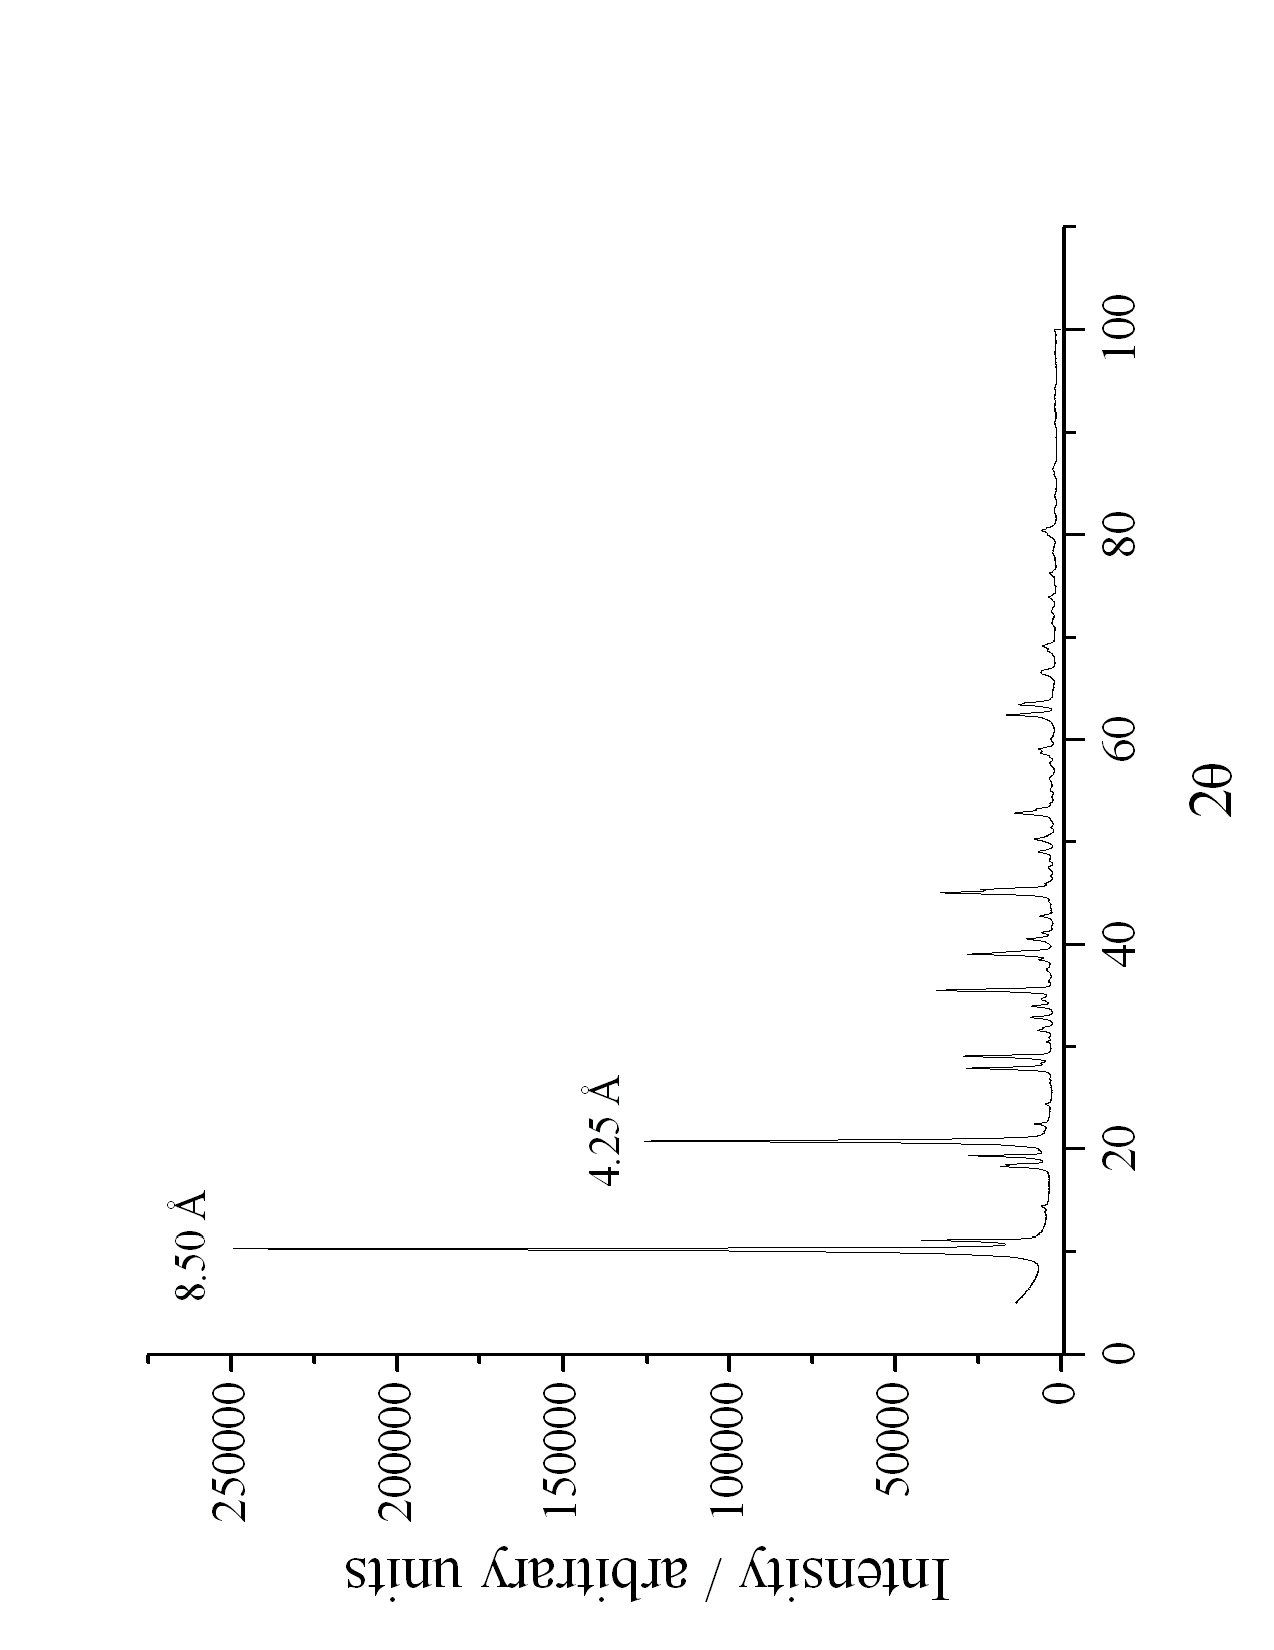


**Indexing of powder XRD data**

All diffraction data has been indexed on the basis of an orthorhombic cell.

**Indexing for [ZnAl4(OH)12](NO3)1.8(CO3)0.1·2.5H2O**

**a = 17.11(3) Å, b = 8.933(19) Å, c = 5.439(10) Å**

| **h** | **k** | **l** | **d[obs]** | **d[calc]** | **Rel. Int. (%)** |
| --- | --- | --- | --- | --- | --- |
|  |  |  |  |  |  |
| 2 | 0 | 0 | 8.6052 | 8.5558 | 100 |
| 1 | 1 | 0 | 7.9642 | 7.9186 | 16.7 |
| 2 | 1 | 0 | 6.1754 | 6.1788 | 2.4 |
| 3 | 0 | 0 | 5.6948 | 5.7039 | 1.6 |
| 2 | 0 | 1 | 4.5990 | 4.5902 | 11.2 |
| 4 | 0 | 0 | 4.2854 | 4.2779 | 49.9 |
| 2 | 2 | 0 | 3.9675 | 3.9593 | 3.2 |
| 4 | 0 | 1 | 3.3708 | 3.3625 | 1.4 |
| 2 | 2 | 1 | 3.2018 | 3.2011 | 11.3 |
| 4 | 2 | 0 | 3.0759 | 3.0894 | 11.8 |
| 0 | 3 | 0 | 2.9840 | 2.9775 | 1.4 |
| 3 | 2 | 1 | 2.9361 | 2.9531 | 1.8 |
| 5 | 0 | 1 | 2.8978 | 2.8967 | 1.5 |
| 0 | 0 | 2 | 2.7284 | 2.7196 | 3.7 |
| 3 | 3 | 0 | 2.6415 | 2.6395 | 3.5 |
| 2 | 0 | 2 | 2.5909 | 2.5918 | 2.4 |
| 1 | 3 | 1 | 2.5909 | 2.5819 | 2.4 |
| 6 | 0 | 1 | 2.5297 | 2.5258 | 14.9 |
| 6 | 2 | 0 | 2.3966 | 2.4037 | 1.8 |
| 1 | 2 | 2 | 2.3078 | 2.3018 | 11.2 |
| 7 | 0 | 1 | 2.2270 | 2.2297 | 4.0 |
| 4 | 3 | 1 | 2.2270 | 2.2292 | 4.0 |
| 6 | 2 | 1 | 2.1953 | 2.1986 | 2.4 |
| 8 | 1 | 0 | 2.0891 | 2.0802 | 1.3 |
| 8 | 1 | 0 | 2.0725 | 2.0802 | 1.4 |
| 5 | 1 | 2 | 2.0725 | 2.0712 | 1.4 |
| 4 | 2 | 2 | 2.0471 | 2.0413 | 1.6 |
| 2 | 4 | 1 | 2.0132 | 2.0081 | 14.5 |
| 0 | 3 | 2 | 2.0132 | 2.0081 | 14.5 |
| 4 | 4 | 0 | 1.9762 | 1.9797 | 2.0 |
| 8 | 1 | 1 | 1.9465 | 1.9429 | 1.3 |
| 3 | 4 | 1 | 1.9465 | 1.9424 | 1.3 |
| 6 | 1 | 2 | 1.9149 | 1.9221 | 1.6 |
| 7 | 3 | 0 | 1.8870 | 1.8894 | 1.5 |
| 9 | 1 | 0 | 1.8574 | 1.8596 | 2.8 |
| 4 | 3 | 2 | 1.8151 | 1.8178 | 3.3 |
| 0 | 0 | 3 | 1.8151 | 1.8131 | 3.3 |
| 1 | 5 | 0 | 1.7762 | 1.7769 | 1.2 |
| 0 | 1 | 3 | 1.7762 | 1.7769 | 1.2 |
| 2 | 0 | 3 | 1.7762 | 1.7737 | 1.2 |
| 5 | 3 | 2 | 1.7330 | 1.7319 | 5.6 |
| 1 | 5 | 1 | 1.6863 | 1.6890 | 1.2 |
| 9 | 2 | 1 | 1.6656 | 1.6654 | 1.3 |
| 2 | 5 | 1 | 1.6656 | 1.6649 | 1.3 |
| 10 | 0 | 1 | 1.6360 | 1.6323 | 1.5 |
| 9 | 3 | 0 | 1.5978 | 1.6025 | 1.4 |
| 4 | 4 | 2 | 1.5978 | 1.6005 | 1.4 |
| 8 | 2 | 2 | 1.5718 | 1.5735 | 2.5 |
| 4 | 2 | 3 | 1.5645 | 1.5637 | 2.7 |
| 5 | 4 | 2 | 1.5402 | 1.5410 | 1.3 |
| 1 | 5 | 2 | 1.4876 | 1.4875 | 6.6 |
| 2 | 6 | 0 | 1.4662 | 1.4667 | 5.3 |
| 7 | 5 | 0 | 1.4432 | 1.4424 | 1.1 |
| 1 | 4 | 3 | 1.4041 | 1.4028 | 2.5 |
| 5 | 6 | 0 | 1.3652 | 1.3652 | 1.7 |
| 8 | 2 | 3 | 1.3208 | 1.3212 | 1.2 |
| 10 | 3 | 2 | 1.3025 | 1.3024 | 1.2 |

**Indexing for [CuAl4(OH)12](NO3)2·2.5H2O**

**a = 17.07(3) Å, b = 8.945(17) Å, c = 5.298(7) Å**

**
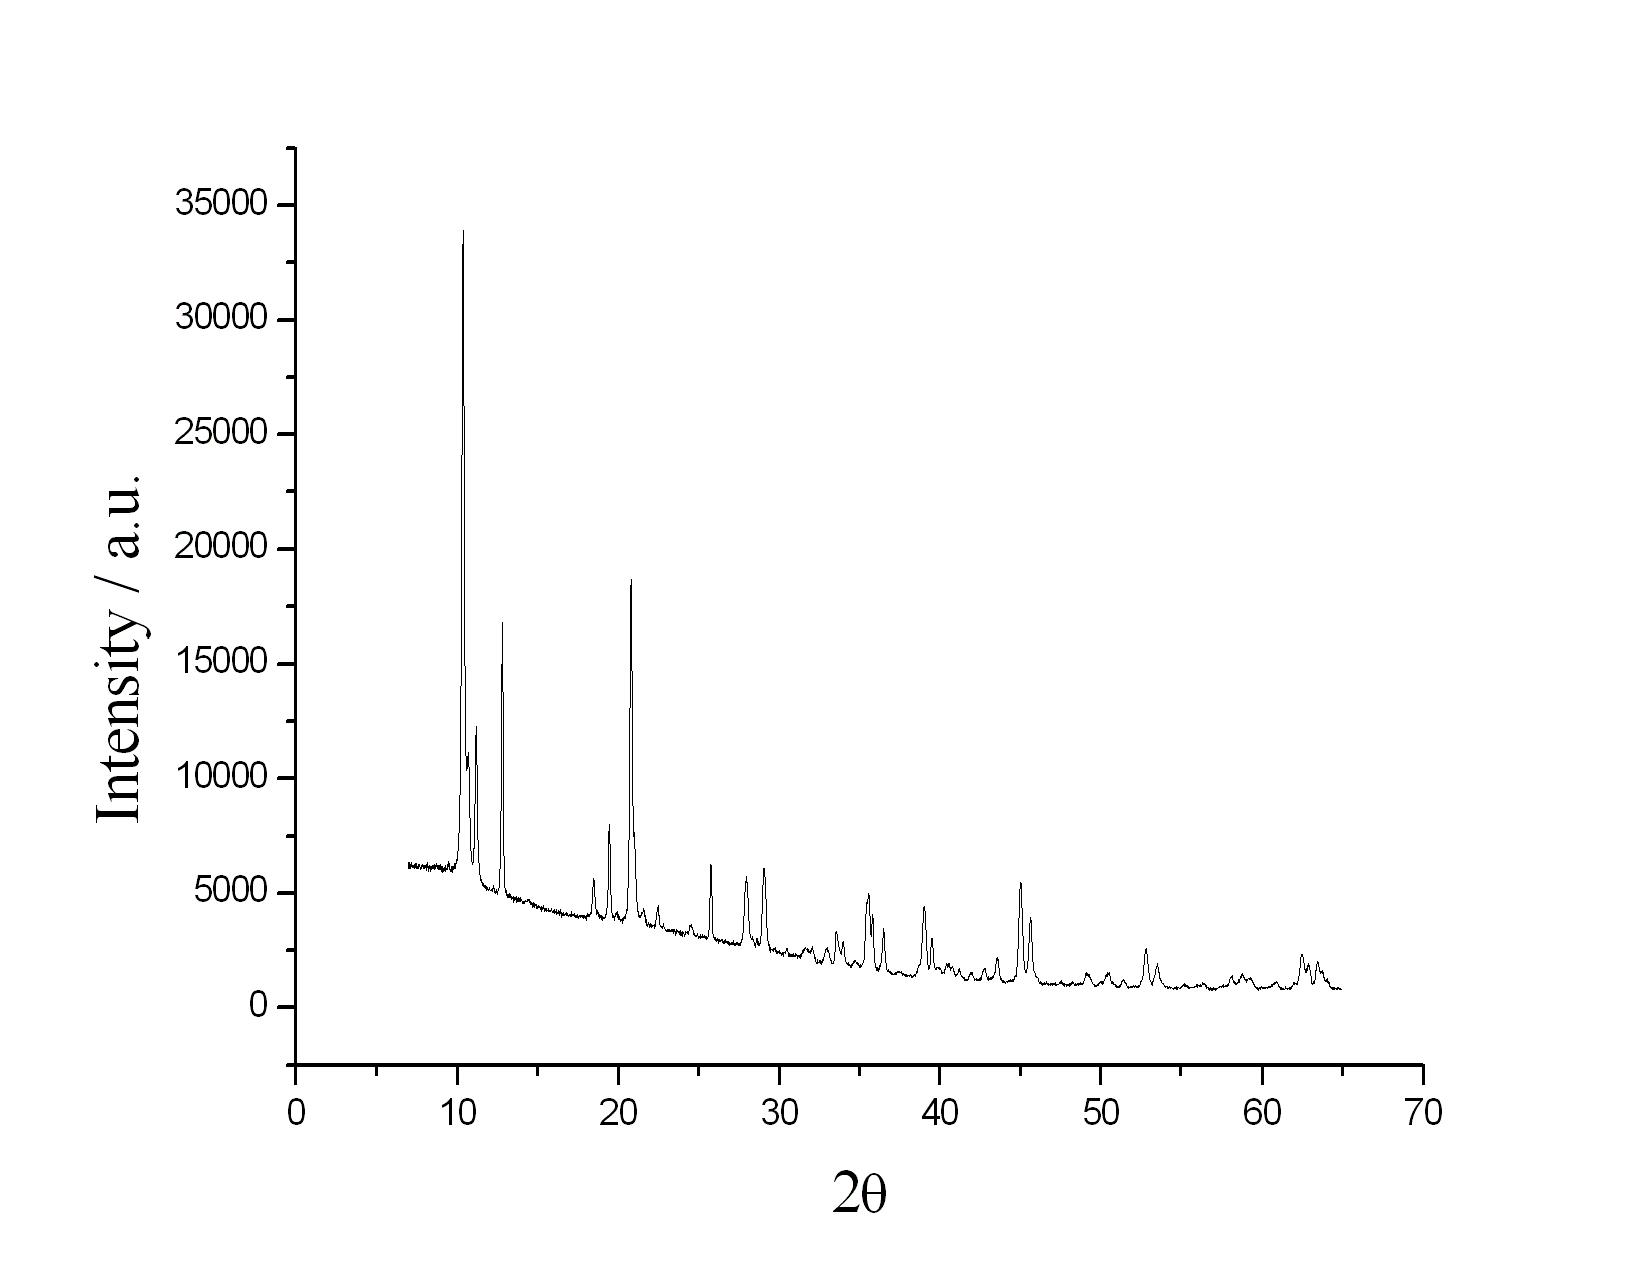
**

| **h** | **k** | **l** | **d[obs]** | **d[calc]** | **Rel. Int. (%)** |
| --- | --- | --- | --- | --- | --- |
|  |  |  |  |  |  |
| 2 | 0 | 0 | 8.5598 | 8.5355 | 100.0 |
| 1 | 1 | 0 | 7.9337 | 7.9230 | 36.2 |
| 2 | 1 | 0 | 6.1697 | 6.1751 | 14.0 |
| 3 | 1 | 0 | 4.8047 | 4.8011 | 16.3 |
| 0 | 1 | 1 | 4.5629 | 4.5585 | 23.4 |
| 0 | 2 | 0 | 4.4580 | 4.4724 | 12.1 |
| 4 | 0 | 0 | 4.2719 | 4.2677 | 55.3 |
| 2 | 2 | 0 | 3.9583 | 3.9615 | 12.6 |
| 5 | 1 | 0 | 3.1902 | 3.1897 | 16.7 |
| 4 | 1 | 1 | 3.1166 | 3.1155 | 9.0 |
| 4 | 2 | 0 | 3.0717 | 3.0876 | 18.2 |
| 1 | 3 | 0 | 2.9348 | 2.9371 | 7.4 |
| 2 | 3 | 0 | 2.8259 | 2.8148 | 7.7 |
| 5 | 2 | 0 | 2.7158 | 2.7138 | 7.7 |
| 4 | 2 | 1 | 2.6683 | 2.6676 | 9.9 |
| 3 | 3 | 0 | 2.6379 | 2.6410 | 8.3 |
| 1 | 3 | 1 | 2.5814 | 2.5688 | 6.0 |
| 2 | 0 | 2 | 2.5261 | 2.5300 | 14.6 |
| 6 | 2 | 0 | 2.3984 | 2.4006 | 4.7 |
| 0 | 2 | 2 | 2.2789 | 2.2792 | 9.1 |
| 1 | 2 | 2 | 2.2605 | 2.2592 | 5.3 |
| 0 | 4 | 0 | 2.2309 | 2.2362 | 5.7 |
| 6 | 2 | 1 | 2.1897 | 2.1866 | 4.8 |
| 7 | 1 | 1 | 2.1522 | 2.1503 | 4.5 |
| 3 | 2 | 2 | 2.1134 | 2.1158 | 4.9 |
| 3 | 4 | 0 | 2.0763 | 2.0812 | 6.5 |
| 8 | 1 | 0 | 2.0763 | 2.0756 | 6.5 |
| 4 | 2 | 2 | 2.0127 | 2.0105 | 16.4 |
| 7 | 2 | 1 | 1.9867 | 1.9851 | 11.4 |
| 9 | 1 | 0 | 1.8547 | 1.8555 | 4.4 |
| 8 | 2 | 1 | 1.8077 | 1.8100 | 4.4 |
| 7 | 3 | 1 | 1.7762 | 1.7782 | 3.6 |
| 0 | 1 | 3 | 1.7321 | 1.7326 | 7.6 |
| 5 | 3 | 2 | 1.7115 | 1.7130 | 5.5 |
| 8 | 0 | 2 | 1.6621 | 1.6618 | 2.9 |
| 10 | 1 | 1 | 1.5983 | 1.5987 | 2.8 |
| 5 | 0 | 3 | 1.5706 | 1.5686 | 4.2 |
| 8 | 2 | 2 | 1.5598 | 1.5577 | 3.8 |
| 9 | 1 | 2 | 1.5206 | 1.5198 | 3.3 |
| 2 | 3 | 3 | 1.4952 | 1.4960 | 3.2 |
| 1 | 6 | 0 | 1.4859 | 1.4851 | 7.0 |
| 1 | 5 | 2 | 1.4777 | 1.4770 | 5.5 |
| 6 | 4 | 2 | 1.4654 | 1.4649 | 5.9 |

**Indexing for [NiAl4(OH)12](NO3)1.8(CO3)0.1·2.5H2O**

**a = 17.09(4) Å, b = 8.857(14) Å, c = 5.283(10) Å**

**
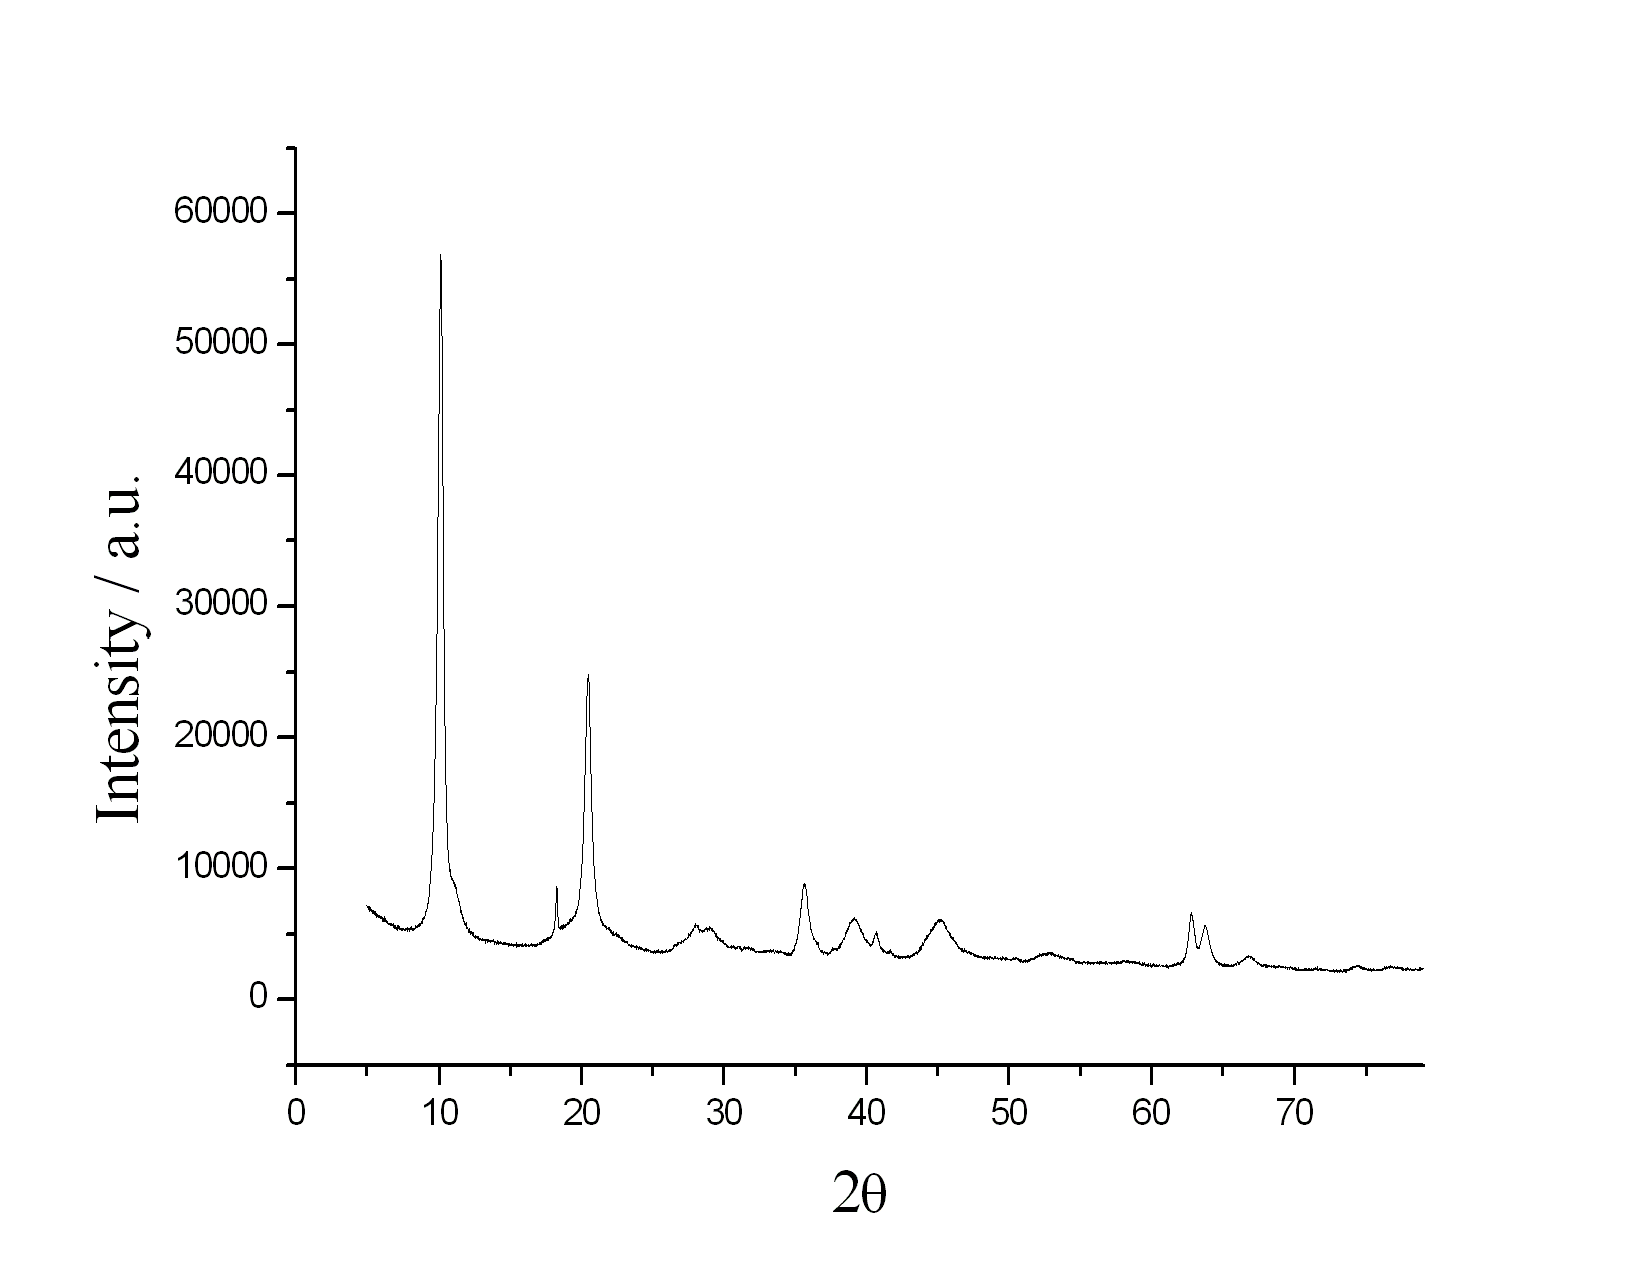
**

| **h** | **k** | **l** | **d[obs]** | **d[calc]** | **Rel. Int. (%)** |
| --- | --- | --- | --- | --- | --- |
|  |  |  |  |  |  |
| 2 | 0 | 0 | 8.5964 | 8.5443 | 0.0 |
| 1 | 1 | 0 | 7.9131 | 7.8638 | 15.4 |
| 3 | 1 | 0 | 4.7939 | 4.7910 | 30.2 |
| 0 | 1 | 1 | 4.5522 | 4.5373 | 7.8 |
| 1 | 2 | 0 | 4.3138 | 4.2871 | 11.0 |
| 4 | 0 | 0 | 4.2332 | 4.2722 | 58.2 |
| 2 | 1 | 1 | 4.0065 | 4.0073 | 1.0 |
| 2 | 2 | 0 | 3.9533 | 3.9319 | 0.4 |
| 3 | 2 | 0 | 3.4748 | 3.4963 | 0.3 |
| 1 | 2 | 1 | 3.3201 | 3.3289 | 2.0 |
| 2 | 2 | 1 | 3.1520 | 3.1542 | 12.8 |
| 1 | 3 | 0 | 2.9115 | 2.9094 | 1.2 |
| 6 | 0 | 0 | 2.8430 | 2.8481 | 1.5 |
| 2 | 3 | 0 | 2.7912 | 2.7906 | 3.1 |
| 0 | 0 | 2 | 2.6455 | 2.6415 | 0.9 |
| 3 | 3 | 0 | 2.6191 | 2.6213 | 0.6 |
| 1 | 1 | 2 | 2.4922 | 2.5040 | 22.0 |
| 4 | 3 | 0 | 2.4303 | 2.4289 | 2.0 |
| 3 | 1 | 2 | 2.3040 | 2.3132 | 3.1 |
| 0 | 2 | 2 | 2.2702 | 2.2686 | 14.4 |
| 2 | 2 | 2 | 2.1918 | 2.1927 | 5.2 |
| 1 | 4 | 1 | 2.0201 | 2.0278 | 2.7 |
| 7 | 2 | 1 | 1.9794 | 1.9818 | 17.1 |
| 6 | 1 | 2 | 1.8949 | 1.8921 | 1.3 |
| 8 | 2 | 1 | 1.8090 | 1.8078 | 0.9 |
| 9 | 0 | 1 | 1.7869 | 1.7868 | 3.0 |
| 5 | 3 | 2 | 1.7049 | 1.7059 | 5.1 |
| 2 | 4 | 2 | 1.6664 | 1.6645 | 1.5 |
| 3 | 2 | 3 | 1.5731 | 1.5728 | 1.8 |
| 5 | 5 | 0 | 1.5731 | 1.5728 | 1.8 |
| 5 | 1 | 3 | 1.5417 | 1.5415 | 1.5 |
| 2 | 3 | 3 | 1.4881 | 1.4893 | 0.9 |
| 3 | 3 | 3 | 1.4635 | 1.4618 | 1.1 |
| 6 | 5 | 1 | 1.4459 | 1.4467 | 7.1 |
| 12 | 0 | 0 | 1.4231 | 1.4241 | 0.5 |
| 7 | 1 | 3 | 1.4116 | 1.4100 | 0.6 |
| 4 | 6 | 0 | 1.3974 | 1.3953 | 1.2 |
| 7 | 5 | 1 | 1.3847 | 1.3837 | 3.4 |
| 12 | 1 | 1 | 1.3585 | 1.3587 | 1.0 |
| 4 | 6 | 1 | 1.3499 | 1.3490 | 1.2 |
| 3 | 4 | 3 | 1.3405 | 1.3396 | 1.7 |
| 0 | 0 | 4 | 1.3212 | 1.3208 | 0.5 |
| 12 | 2 | 1 | 1.3154 | 1.3131 | 1.0 |
| 6 | 5 | 2 | 1.3081 | 1.3072 | 0.5 |

**Indexing for [CoAl4(OH)12](NO3)1.8(CO3)0.1·2.5H2O**

**a = 17.09(4) Å, b = 5.857(14) Å, c = 5.238(10) Å**

**
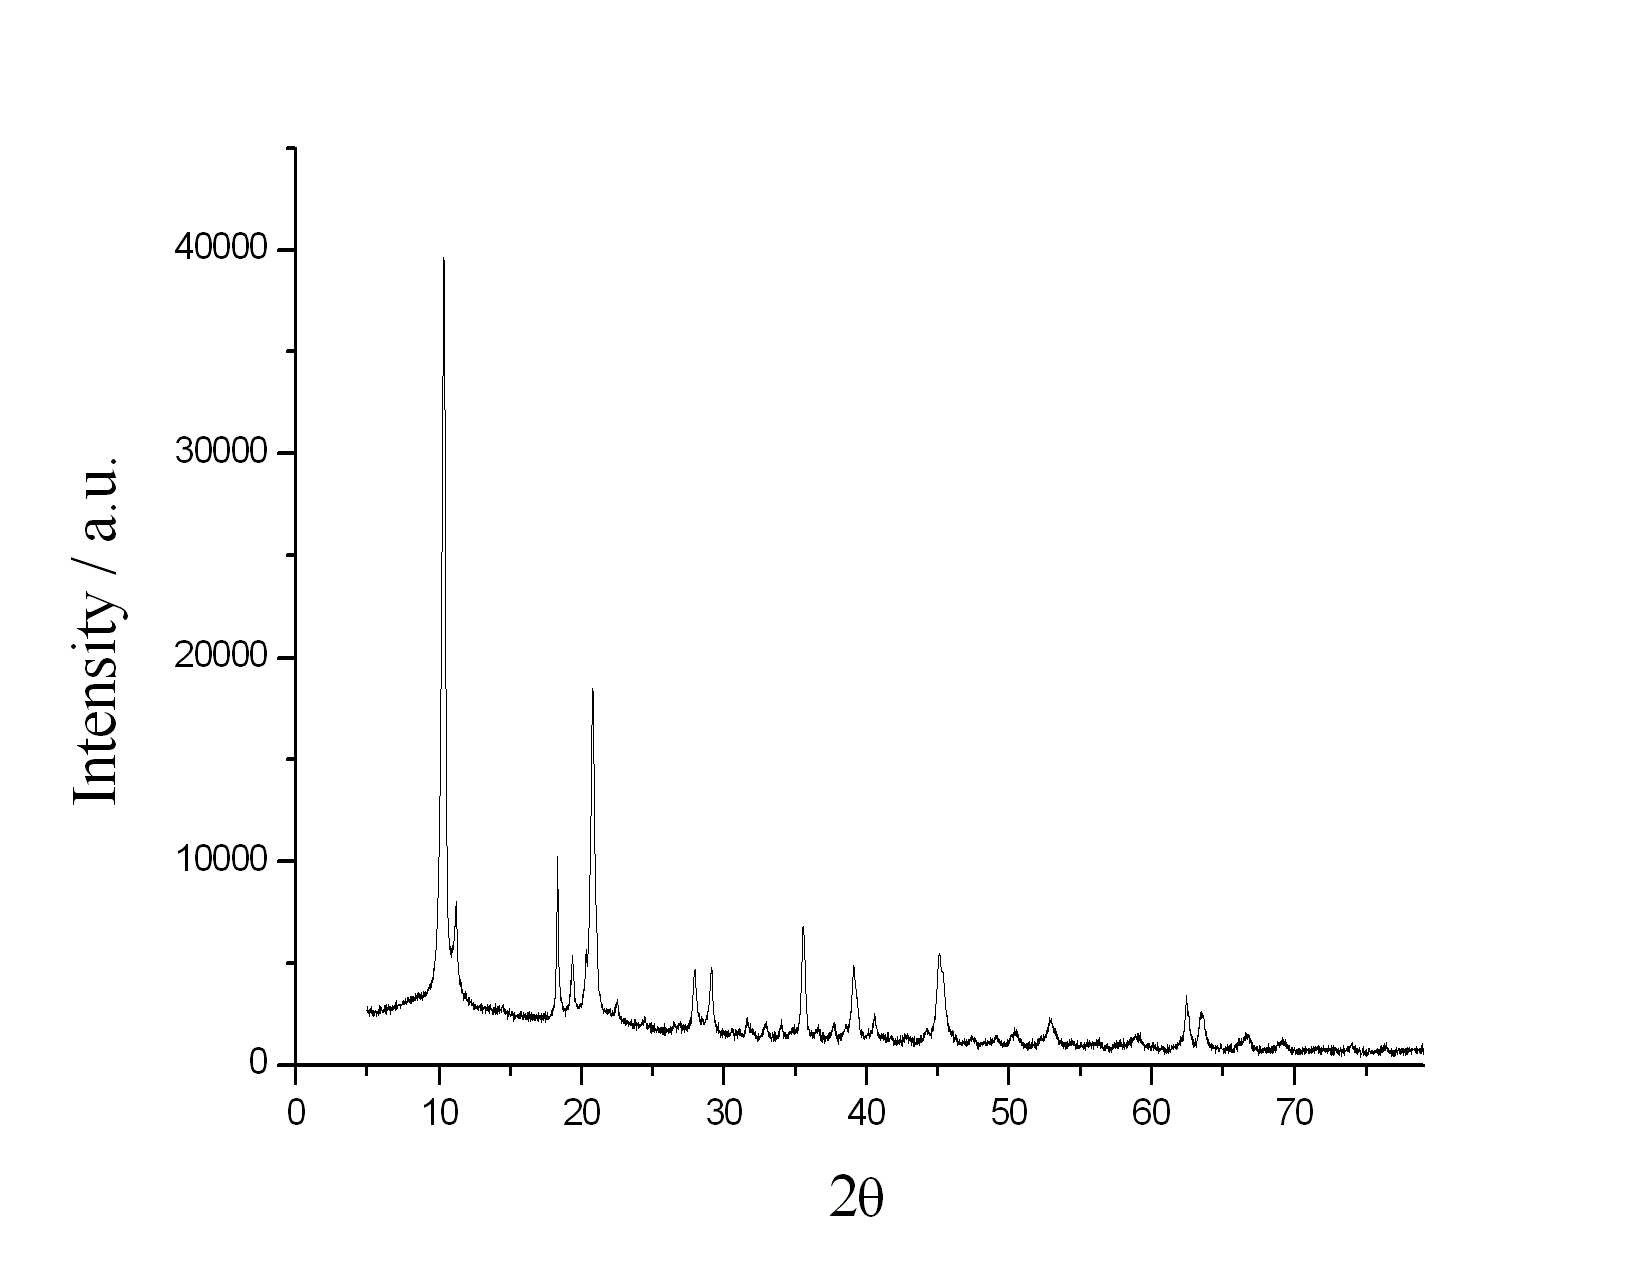
**

| **h** | **k** | **l** | **d[obs]** | **d[calc]** | **Rel. Int. (%)** |
| --- | --- | --- | --- | --- | --- |
| 2 | 0 | 0 | 8.5964 | 8.5443 | 100 |
| 1 | 1 | 0 | 7.9131 | 7.8638 | 15.4 |
| 3 | 1 | 0 | 4.7939 | 4.791 | 30.2 |
| 0 | 1 | 1 | 4.5522 | 4.5373 | 7.8 |
| 1 | 2 | 0 | 4.3138 | 4.2871 | 11.0 |
| 4 | 0 | 0 | 4.2332 | 4.2722 | 58.2 |
| 2 | 1 | 1 | 4.0065 | 4.0073 | 1.0 |
| 2 | 2 | 0 | 3.9533 | 3.9319 | 0.4 |
| 3 | 2 | 0 | 3.4748 | 3.4963 | 0.3 |
| 1 | 2 | 1 | 3.3201 | 3.3289 | 2.0 |
| 2 | 2 | 1 | 3.152 | 3.1542 | 12.8 |
| 1 | 3 | 0 | 2.9115 | 2.9094 | 1.2 |
| 6 | 0 | 0 | 2.843 | 2.8481 | 1.5 |
| 2 | 3 | 0 | 2.7912 | 2.7906 | 3.1 |
| 4 | 2 | 1 | 2.6455 | 2.6574 | 0.9 |
| 0 | 0 | 2 | 2.6455 | 2.6415 | 0.9 |
| 3 | 3 | 0 | 2.6191 | 2.6213 | 0.6 |
| 1 | 1 | 2 | 2.4922 | 2.504 | 22.0 |
| 4 | 3 | 0 | 2.4303 | 2.4289 | 2.0 |
| 2 | 1 | 2 | 2.4303 | 2.4271 | 2.0 |
| 3 | 1 | 2 | 2.304 | 2.3132 | 3.1 |
| 0 | 2 | 2 | 2.2702 | 2.2686 | 14.4 |
| 2 | 2 | 2 | 2.1918 | 2.1927 | 5.2 |
| 1 | 4 | 1 | 2.0201 | 2.0278 | 2.7 |
| 7 | 2 | 1 | 1.9794 | 1.9818 | 17.1 |
| 6 | 1 | 2 | 1.8949 | 1.8921 | 1.3 |
| 8 | 2 | 1 | 1.809 | 1.8078 | 0.9 |
| 9 | 0 | 1 | 1.7869 | 1.7868 | 3.0 |
| 5 | 3 | 2 | 1.7049 | 1.7059 | 5.1 |
| 2 | 4 | 2 | 1.6664 | 1.6645 | 1.5 |
| 3 | 2 | 3 | 1.5731 | 1.5728 | 1.8 |
| 5 | 5 | 0 | 1.5731 | 1.5728 | 1.8 |
| 5 | 1 | 3 | 1.5417 | 1.5415 | 1.5 |
| 2 | 3 | 3 | 1.4881 | 1.4893 | 0.9 |
| 3 | 3 | 3 | 1.4635 | 1.4618 | 1.1 |
| 6 | 5 | 1 | 1.4459 | 1.4467 | 7.1 |
| 12 | 0 | 0 | 1.4231 | 1.4241 | 0.5 |
| 11 | 2 | 1 | 1.4116 | 1.4126 | 0.6 |
| 4 | 6 | 0 | 1.3974 | 1.3953 | 1.2 |
| 7 | 5 | 1 | 1.3847 | 1.3837 | 3.4 |
| 12 | 1 | 1 | 1.3585 | 1.3587 | 1.0 |
| 5 | 5 | 2 | 1.3499 | 1.3514 | 1.2 |
| 3 | 4 | 3 | 1.3405 | 1.3396 | 1.7 |
| 0 | 0 | 4 | 1.3212 | 1.3208 | 0.5 |
| 12 | 2 | 1 | 1.3154 | 1.3131 | 1.0 |
| 6 | 5 | 2 | 1.3081 | 1.3072 | 0.5 |

**TGA trace for [ZnAl4(OH)12](NO3)1.8(CO3)0.1·2.5H2O**

**
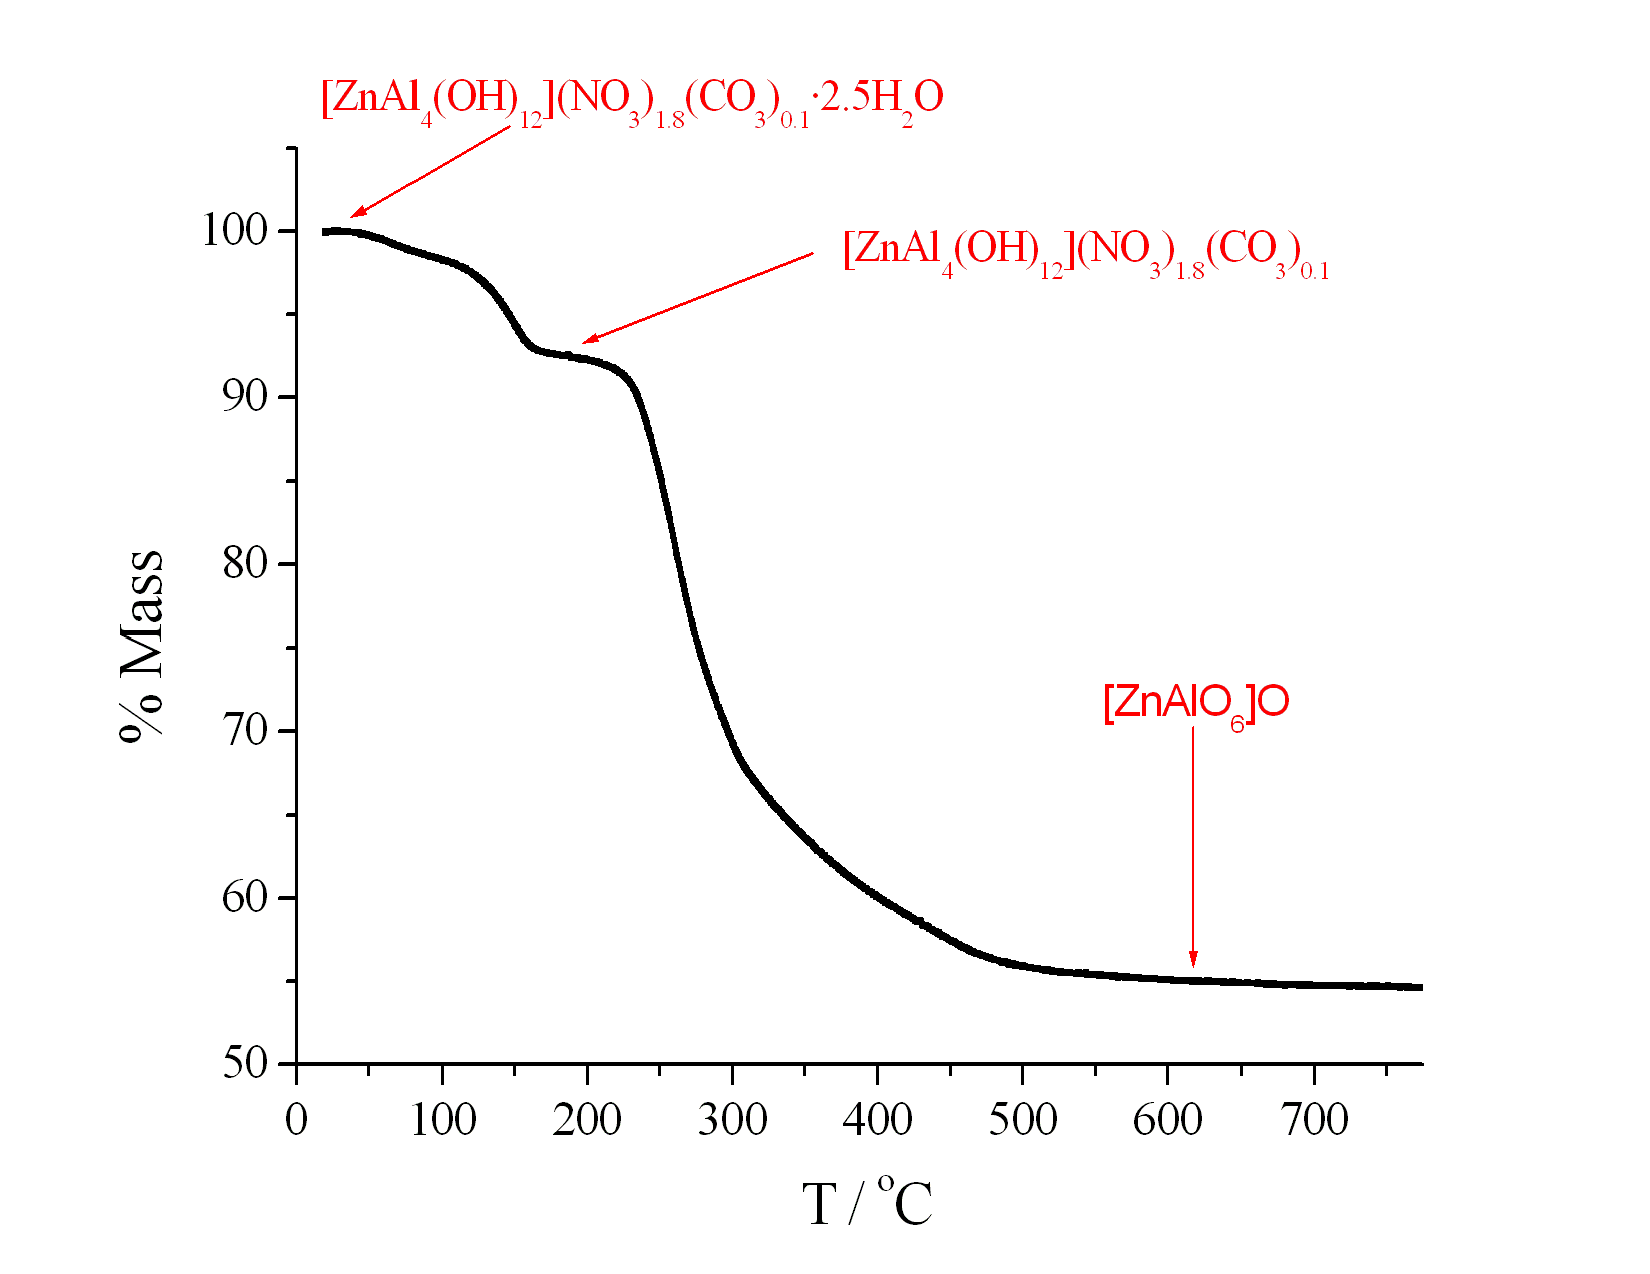
**
